# Supplementary material for: Salinity Gradients Determine the Resilience of Estuarine Microbial Ecosystems to Extreme Weather Events
Source: Research Square preprint supplement (doi:10.21203/rs.3.rs-8314568/v1), 2025-12-17
Supplement: Supplementary file 1 [file f61063cf030c1ef4eda22b2e.xlsx]

## Sheet: S1-sample_lat_lon
Source	SRA_sample	Sequencing region	Storm	latitude	longitude	Sample_Area
Meta data	SRR12204216_1.fastq.gz	V4	Typhoon	21.5	110.35	Estuary
Meta data	SRR12204216_2.fastq.gz	V4	Typhoon	21.5	110.35	Estuary
Meta data	SRR12204217_1.fastq.gz	V4	Typhoon	21	110.5	Estuary
Meta data	SRR12204219_1.fastq.gz	V4	Typhoon	21.5	110.35	Estuary
Meta data	SRR12204220_1.fastq.gz	V4	Typhoon	21	110.5	Estuary
Meta data	SRR12204221_1.fastq.gz	V4	Typhoon	21.5	110.35	Estuary
Meta data	SRR12204222_1.fastq.gz	V4	No_Typhoon	22.15	113.4	Estuary
Meta data	SRR12204222_2.fastq.gz	V4	No_Typhoon	22.15	113.4	Estuary
Meta data	SRR12204223_1.fastq.gz	V4	No_Typhoon	22	113.35	Estuary
Meta data	SRR12204223_2.fastq.gz	V4	No_Typhoon	22	113.35	Estuary
Meta data	SRR12204224_1.fastq.gz	V4	No_Typhoon	22.15	113.4	Estuary
Meta data	SRR12204224_2.fastq.gz	V4	No_Typhoon	22.15	113.4	Estuary
Meta data	SRR12204225_1.fastq.gz	V4	No_Typhoon	22	113.35	Estuary
Meta data	SRR12204225_2.fastq.gz	V4	No_Typhoon	22	113.35	Estuary
Meta data	SRR12204226_1.fastq.gz	V4	No_Typhoon	22.15	113.4	Estuary
Meta data	SRR12204226_2.fastq.gz	V4	No_Typhoon	22.15	113.4	Estuary
Meta data	SRR12204227_1.fastq.gz	V4	Typhoon	22	113.35	Estuary
Meta data	SRR12204227_2.fastq.gz	V4	Typhoon	22	113.35	Estuary
Meta data	SRR12204228_1.fastq.gz	V4	Typhoon	22.15	113.4	Estuary
Meta data	SRR12204228_2.fastq.gz	V4	Typhoon	22.15	113.4	Estuary
Meta data	SRR12204230_1.fastq.gz	V4	Typhoon	22	113.35	Estuary
Meta data	SRR12204230_2.fastq.gz	V4	Typhoon	22	113.35	Estuary
Meta data	SRR12204231_1.fastq.gz	V4	Typhoon	22.15	113.4	Estuary
Meta data	SRR12204231_2.fastq.gz	V4	Typhoon	22.15	113.4	Estuary
Meta data	SRR12204232_1.fastq.gz	V4	Typhoon	22.15	113.4	Estuary
Meta data	SRR12204232_2.fastq.gz	V4	Typhoon	22.15	113.4	Estuary
Meta data	SRR10087921	V3-V4	No_Typhoon	26.51	127.87	Estuary
Meta data	SRR10087932	V3-V4	Typhoon	26.51	127.87	Estuary
Meta data	SRR10087943	V3-V4	Typhoon	26.51	127.87	Estuary
Meta data	SRR10087954	V3-V4	No_Typhoon	26.51	127.87	Estuary
Meta data	SRR10087965	V3-V4	Typhoon	26.51	127.87	Estuary
Meta data	SRR10087976	V3-V4	Typhoon	26.51	127.87	Estuary
Meta data	SRR10087987	V3-V4	No_Typhoon	26.51	127.87	Estuary
Meta data	SRR10087998	V3-V4	Typhoon	26.51	127.87	Estuary
Meta data	SRR10088079	V3-V4	Typhoon	26.51	127.87	Estuary
Meta data	SRR10088090	V3-V4	Typhoon	26.51	127.87	Estuary
Meta data	SRR10088091	V3-V4	Typhoon	26.51	127.87	Estuary
Meta data	SRR10088092	V3-V4	No_Typhoon	26.51	127.87	Estuary
Meta data	SEBSD01B1	V4-V5	Typhoon	166.416	_22.195537	Estuary
Meta data	SEBSD01B2	V4-V5	Typhoon	166.416	_22.195537	Estuary
Meta data	SEBSD01B3	V4-V5	Typhoon	166.416	_22.195537	Estuary
Meta data	SEBSD01B4	V4-V5	Typhoon	166.416	_22.195537	Estuary
Meta data	SEBSD01B5	V4-V5	Typhoon	166.416	_22.195537	Estuary
Meta data	SEBSD01B6	V4-V5	Typhoon	166.416	_22.195537	Estuary
Meta data	SEBSD02B7	V4-V5	Typhoon	166.416	_22.195537	Estuary
Meta data	SEBSD02B8	V4-V5	Typhoon	166.416	_22.195537	Estuary
Meta data	SEBSD02B9	V4-V5	Typhoon	166.416	_22.195537	Estuary
Meta data	SEBSD17B54	V4	Typhoon	166.416	_22.195537	Estuary
Meta data	SEBSD17B55	V4	Typhoon	166.416	_22.195537	Estuary
Meta data	SEBSD17B56	V4	Typhoon	166.416	_22.195537	Estuary
Meta data	SEBSD18B57	V4	Typhoon	166.416	_22.195537	Estuary
Meta data	SEBSD18B59	V4	Typhoon	166.416	_22.195537	Estuary
Meta data	SRR9904942	V4	No_Typhoon	29.3126	94.8179	Estuary
Meta data	SRR9904943	V4	No_Typhoon	29.3126	94.8179	Estuary
Meta data	SRR9904944	V4	Typhoon	29.4514	94.8456	Estuary
Meta data	SRR9904953	V4	Typhoon	29.6706	94.9789	Estuary
Meta data	SRR9904956	V4	Typhoon	29.4497	94.8458	Estuary
Meta data	SRR9905013	V4	Typhoon	29.4492	94.8794	Estuary
Meta data	SRR9905016	V4	Typhoon	29.6681	94.9781	Estuary
Meta data	SRR9905023	V4	Typhoon	29.6722	94.8461	Estuary
Meta data	SRR9905026	V4	Typhoon	29.4508	94.8467	Estuary
Meta data	SRR9905033	V4	Typhoon	29.4515	94.8471	Estuary
Meta data	SRR9905036	V4	Typhoon	29.671	94.9787	Estuary
Meta data	SRR3418390	V3-V4	Typhoon	40°29′51.85″	78°0′51.02″	River
Meta data	SRR3418391	V3-V4	Typhoon	40°29′51.85″	78°0′51.02″	River
Meta data	SRR3418392	V3-V4	Typhoon	40°29′51.85″	78°0′51.02″	River
Meta data	SRR3418407	V3-V4	Typhoon	40°29′51.85″	78°0′51.02″	River
Meta data	SRR3418409	V3-V4	Typhoon	40°29′51.85″	78°0′51.02″	River
Meta data	SRR3418410	V3-V4	Typhoon	40°29′51.85″	78°0′51.02″	River
Meta data	SRR10955807	V3-V4	No_Typhoon	42.715	3.01507	River
Meta data	SRR10955816	V3-V4	Typhoon	42.715	3.01507	River
Meta data	SRR10955817	V3-V4	Typhoon	42.715	3.01507	River
Meta data	SRR10955818	V3-V4	No_Typhoon	42.715	3.01507	River
Meta data	SRR10955820	V3-V4	Typhoon	42.715	3.01507	River
Meta data	SRR10955821	V3-V4	Typhoon	42.715	3.01507	River
Meta data	SRR10955822	V3-V4	Typhoon	42.715	3.01507	River
Meta data	SRR10955823	V3-V4	Typhoon	42.715	3.01507	River
Meta data	SRR10955824	V3-V4	Typhoon	42.715	3.01507	River
Meta data	SRR10955825	V3-V4	Typhoon	42.715	3.01507	River
Meta data	SRR16967591	V4-V5	No_Typhoon	35.77	75.47	Estuary
Meta data	SRR16967592	V4-V5	No_Typhoon	35.03	75.28	Estuary
Meta data	SRR16967602	V4-V5	No_Typhoon	35.86	75.69	Estuary
Meta data	SRR16967603	V4-V5	No_Typhoon	35.76	75.53	Estuary
Meta data	SRR16967604	V4-V5	No_Typhoon	35.75	75.59	Estuary
Meta data	SRR16967605	V4-V5	No_Typhoon	35.64	75.63	Estuary
Meta data	SRR16967606	V4-V5	No_Typhoon	35.49	75.67	Estuary
Meta data	SRR16967618	V4-V5	Typhoon	35.88	75.36	Estuary
Meta data	SRR16967619	V4-V5	Typhoon	35.9	75.2	Estuary
Meta data	SRR16967620	V4-V5	Typhoon	35.9	75.09	Estuary
Meta data	SRR16967622	V4-V5	Typhoon	35.88	74.83	Estuary
Meta data	SRR16967623	V4-V5	Typhoon	35.78	75.53	Estuary
Meta data	SRR16967624	V4-V5	Typhoon	35.81	75.59	Estuary
Meta data	SRR16967625	V4-V5	Typhoon	35.88	75.71	Estuary
Meta data	SRR16967626	V4-V5	Typhoon	35.79	75.62	Estuary
Meta data	SRR16967627	V4-V5	Typhoon	35.75	75.53	Estuary
Meta data	SRR16967628	V4-V5	Typhoon	35.77	75.54	Estuary
Meta data	SRR16967629	V4-V5	Typhoon	35.76	75.59	Estuary
Meta data	SRR16967630	V4-V5	Typhoon	35.7	75.66	Estuary
Meta data	SRR16967631	V4-V5	Typhoon	35.65	75.62	Estuary
Meta data	SRR16967633	V4-V5	Typhoon	35.49	75.66	Estuary
Meta data	SRR16967634	V4-V5	Typhoon	35.38	75.8	Estuary
Meta data	SRR16967635	V4-V5	Typhoon	35.88	75.36	Estuary
Meta data	SRR16967636	V4-V5	Typhoon	35.9	75.2	Estuary
Meta data	SRR16967637	V4-V5	Typhoon	35.9	75.09	Estuary
Meta data	SRR16967638	V4-V5	Typhoon	35.88	74.83	Estuary
Meta data	SRR16967639	V4-V5	Typhoon	35.78	75.53	Estuary
Meta data	SRR16967640	V4-V5	Typhoon	35.81	75.59	Estuary
Meta data	SRR16967641	V4-V5	Typhoon	35.88	75.71	Estuary
Meta data	SRR16967642	V4-V5	Typhoon	35.79	75.62	Estuary
Meta data	SRR16967644	V4-V5	Typhoon	35.75	75.53	Estuary
Meta data	SRR16967645	V4-V5	Typhoon	35.77	75.54	Estuary
Meta data	SRR16967646	V4-V5	Typhoon	35.76	75.59	Estuary
Meta data	SRR16967647	V4-V5	Typhoon	35.7	75.66	Estuary
Meta data	SRR16967648	V4-V5	Typhoon	35.65	75.62	Estuary
Meta data	SRR16967650	V4-V5	Typhoon	35.38	75.8	Estuary
Meta data	SRR16967652	V4-V5	No_Typhoon	35.77	75.47	Estuary
Meta data	SRR16967654	V4-V5	No_Typhoon	35.03	75.28	Estuary
Meta data	SRR16967677	V4-V5	No_Typhoon	35.86	75.69	Estuary
Meta data	SRR16967678	V4-V5	No_Typhoon	35.76	75.53	Estuary
Meta data	SRR16967679	V4-V5	No_Typhoon	35.75	75.59	Estuary
Meta data	SRR16967680	V4-V5	No_Typhoon	35.64	75.63	Estuary
Meta data	SRR16967681	V4-V5	No_Typhoon	35.49	75.67	Estuary
Meta data	SRR16967682	V4-V5	No_Typhoon	35.46	75.77	Estuary
Meta data	SRR16967683	V4-V5	No_Typhoon	35.8	75.52	Estuary
Meta data	SRR16967685	V4-V5	No_Typhoon	35.81	75.45	Estuary
Meta data	SRR16967686	V4-V5	No_Typhoon	35.87	75.13	Estuary
Meta data	SRR16967687	V4-V5	No_Typhoon	35.88	75.01	Estuary
Meta data	SRR16967688	V4-V5	No_Typhoon	35.88	74.84	Estuary
Our data	A1_BT	V3-V4	No_Typhoon	24'50'16	118'41'44	Estuary
Our data	A2_BT	V3-V4	No_Typhoon	24'50'59	118'39'33	Estuary
Our data	A3_BT	V3-V4	No_Typhoon	24'52'27	118'36'12	River
Our data	A4_BT	V3-V4	No_Typhoon	24'52'34	118'35'49	River
Our data	A5_BT	V3-V4	No_Typhoon	24'53'37	118'34'58	River
Our data	A6_BT	V3-V4	No_Typhoon	24'54'36	118'33'53	River
Our data	A7_BT	V3-V4	No_Typhoon	24'55'6	118'33'43	River
Our data	A1_3DPT	V3-V4	Typhoon	24'50'16	118'41'44	Estuary
Our data	A2_3DPT	V3-V4	Typhoon	24'50'59	118'39'33	Estuary
Our data	A3_3DPT	V3-V4	Typhoon	24'52'27	118'36'12	River
Our data	A4_3DPT	V3-V4	Typhoon	24'52'34	118'35'49	River
Our data	A5_3DPT	V3-V4	Typhoon	24'53'37	118'34'58	River
Our data	A6_3DPT	V3-V4	Typhoon	24'54'36	118'33'53	River
Our data	A7_3DPT	V3-V4	Typhoon	24'55'6	118'33'43	River
Our data	A1_24DPT	V3-V4	No_Typhoon	24'50'16	118'41'44	Estuary
Our data	A2_24DPT	V3-V4	No_Typhoon	24'50'59	118'39'33	Estuary
Our data	A3_24DPT	V3-V4	No_Typhoon	24'52'27	118'36'12	River
Our data	A4_24DPT	V3-V4	No_Typhoon	24'52'34	118'35'49	River
Our data	A5_24DPT	V3-V4	No_Typhoon	24'53'37	118'34'58	River
Our data	A6_24DPT	V3-V4	No_Typhoon	24'54'36	118'33'53	River
Our data	A7_24DPT	V3-V4	No_Typhoon	24'55'6	118'33'43	River
Our data	A1_60DPT	V3-V4	No_Typhoon	24'50'16	118'41'44	Estuary
Our data	A2_60DPT	V3-V4	No_Typhoon	24'50'59	118'39'33	Estuary
Our data	A3_60DPT	V3-V4	No_Typhoon	24'52'27	118'36'12	River
Our data	A4_60DPT	V3-V4	No_Typhoon	24'52'34	118'35'49	River
Our data	A5_60DPT	V3-V4	No_Typhoon	24'53'37	118'34'58	River
Our data	A6_60DPT	V3-V4	No_Typhoon	24'54'36	118'33'53	River
Our data	A7_60DPT	V3-V4	No_Typhoon	24'55'6	118'33'43	River

## Sheet: S2-environment factor
Sites	Type	Nitrate(μmol/L)	Nitrite(μmol/L)	Phosphate(μmol/L)	Silicate(μmol/L)	DOC(μmol/L)	TA(μmol/L)	DO(μmol/L)	Salinity(ppt)	Temperature(°C)	pH	Wind_speed(Beaufort Scale)	Rainfall(mm)
BT_A1	QZB	102.37	0.02	1.7	103.8	190.57	1646.5	5.38	30.95	27.9	8.06	2.4	0.1
BT_A2	QZB	161.27	0.06	1.52	190.95	133.99	1337.4	5.37	24.93	29	8.19	2.4	0.1
BT_A3	JJR	193.12	0.04	1.77	174.14	208	768.9	4.69	9.08	30.5	7.69	2.4	0.1
BT_A4	JJR	202.52	0.02	1.81	137.9	117.54	679.5	4.69	9.08	30.5	7.37	2.4	0.1
BT_A5	JJR	205.62	0.04	1.97	227.78	131.41	631.9	3.39	6.09	30.3	7.1	2.4	0.1
BT_A6	JJR	193.6	0.04	1.55	140.2	202.45	624.4	3.2	2.66	30.3	7.24	2.4	0.1
BT_A7	JJR	192.53	0.04	1.51	183.52	223.61	614.3	3.21	0.41	30.1	7.02	2.4	0.1
3DPT_A1	QZB	81.92	6.31	1.67	126.87	306	1236.3	5.01	13.81	26.4	7.8	3.7	82.57
3DPT_A2	QZB	40.48	3.16	1.38	38.47	200.88	1167.6	5	12.44	26.1	7.72	3.7	82.57
3DPT_A3	JJR	212.48	0.61	1.37	161	260.1	363.6	4.21	0.07	25.4	6.93	3.7	82.57
3DPT_A4	JJR	169.14	0.16	1.5	138.95	126.78	388.5	4.89	0.06	25.2	6.95	3.7	82.57
3DPT_A5	JJR	192.52	0.29	1.22	109.05	150.55	362.9	5.28	0.05	25.2	7.02	3.7	82.57
3DPT_A6	JJR	185.86	0.45	1.16	114.42	208.31	341.1	5.8	0.05	25.2	7.09	3.7	82.57
3DPT_A7	JJR	158.82	0.15	1.4	125.15	151.02	369.1	6.08	0.05	25.2	7.62	3.7	82.57
24DPT_A1	QZB	18.51	2.26	0.93	35.5	117.61	1683.6	4.73	26.08	28.7	7.98	2.9	0.1
24DPT_A2	QZB	27.74	3.34	1.35	54.5	130.43	1781.6	4.68	25.26	28.9	8.13	2.9	0.1
24DPT_A3	JJR	112.14	8.6	1.97	187.11	130.84	1183.7	3.96	10.03	28.8	7.66	2.9	0.1
24DPT_A4	JJR	125.76	9.18	2.1	172.26	126.37	929.1	4.09	3.26	29	7.52	2.9	0.1
24DPT_A5	JJR	155.37	15.67	1.94	203.97	108.06	703.2	4.16	0.85	29	7.45	2.9	0.1
24DPT_A6	JJR	150.96	9.16	1.89	128.59	100.75	635.6	4.43	0.26	29.1	7.12	2.9	0.1
24DPT_A7	JJR	157.89	10.27	1.82	243.98	100.9	623.7	4.55	0.22	29.1	6.91	2.9	0.1
60DPT_A1	QZB	45.57	9.06	1.41	66.28	65.69	2079.95	5.39	27.9	23.8	7.95	2.6	0.1
60DPT_A2	QZB	56.04	11.48	1.44	97.92	64.08	2053.05	5.43	28.33	23.9	8.19	2.6	0.1
60DPT_A3	JJR	96.52	18.07	1.29	177.64	82.73	1752.8	5.25	22.86	23.8	7.85	2.6	0.1
60DPT_A4	JJR	199.7	24.86	3.65	336.43	74.28	1697.5	5	17.07	24.1	7.49	2.6	0.1
60DPT_A5	JJR	185.86	27.7	2.71	347.99	88.94	1392.35	4.64	9.1	24.2	7.55	2.6	0.1
60DPT_A6	JJR	215.89	26.71	3.08	433.97	87.69	1134.45	4.35	4.25	24.5	7.53	2.6	0.1
60DPT_A7	JJR	208.25	25	2.98	418.8	110.92	1063.3	4.31	3.41	24.6	7.38	2.6	0.1

## Sheet: S3-typhoon_unique_bacteria
Both the unique microorganisms of typhoon in the meta data and our data
Phylum	Order	Genus	Relative_Abundance in Meta Dataunique microorganisms unique microorganisms (%)	Relative_Abundance in Our Data unique microorganisms (%)
Acidobacteriota	Bryobacterales	Bryobacter	10.3954	0.503145
Actinobacteriota	Frankiales	Blastococcus	0.177699	0.377358
		Modestobacter	0.37761	3.89937
	Coriobacteriales	Collinsella	0.0444247	4.77987
	Corynebacteriales	Dietzia	0.0444247	2.64151
	Micrococcales	Rhodoluna	0.488672	0.628931
Bacteroidota	Chitinophagales	Ferruginibacter	2.59884	1.13208
		Sediminibacterium	5.61972	11.4465
	Cytophagales	Arcicella	0.310973	5.40881
		Emticicia	1.4438	1.25786
		Flectobacillus	7.59662	6.03774
		Flexibacter	0.111062	7.04403
	Flavobacteriales	Flavobacterium	26.7437	8.1761
Bdellovibrionota	Bacteriovoracales	Peredibacter	8.04087	0.880503
	Silvanigrellales	Silvanigrella	0.133274	0.251572
Proteobacteria	Azospirillales	Azospirillum	1.7992	8.1761
	Burkholderiales	Massilia	6.95247	0.377358
		Methylophilus	1.84363	0.503145
		Nitrosomonas	1.35495	0.125786
	Caulobacterales	Phenylobacterium	4.8645	0.503145
	Enterobacterales	Tolumonas	2.11017	0.377358
	Methylococcales	Methylomonas	0.0666371	10.0629
		Methyloparacoccus	0.266548	2.89308
	Pseudomonadales	Acinetobacter	9.5291	3.89937
	Sphingomonadales	Sphingopyxis	1.71035	0.503145
Verrucomicrobiota	Chthoniobacterales	Terrimicrobium	1.93247	10.8176
	Verrucomicrobiales	Prosthecobacter	3.44291	7.2956
